# Supplementary material for: Investigating Effects of Tulathromycin Metaphylaxis on the Fecal Resistome and Microbiome of Commercial Feedlot Cattle Early in the Feeding Period
Source: Front Microbiol. 2018 Jul 30;9:1715. doi: 10.3389/fmicb.2018.01715 (PMC6077226; doi:10.3389/fmicb.2018.01715)
Supplement: Supplementary Data Sheet 5 — Sequencing results and metadata for all 60 samples. [file Data_Sheet_5.XLSX]

## Sheet: sample_metadata
Sample ID	Animal	Time	Treatment	Sequencing	Sequencing	Sequencing	Number of paired-reads	Average	Number of paired-reads	Number of paired non-host reads	Number of paired non-host reads	Number of paired non-host reads	Number of paired non-host reads	AMR abundance
				Batch	Run	Lane	Pre-processing	Phred Score	After trimming	After removing bovine sequences	classified with kraken	aligned to resistance genes	aligned to 16S genes	normalized with Li's equation
11_GGCTAC_L001	1	Day1	Treated	11	1	1	72985725	35.09	69992146	51643315	606695	71933	196028	0.21568
37_CTTGTA_L001	2	Day1	Treated	11	1	1	45656078	34.82	43004261	37718769	2794500	60608	140938	0.289513
51_AGTCAA_L001	3	Day1	Treated	11	1	1	74700329	35.05	71482218	59626525	3173217	65964	206572	0.22421
62_AGTTCC_L002	4	Day1	Treated	12	1	2	53294398	35.03	50859060	43158901	5289938	60960	157257	0.304007
83_ATGTCA_L002	5	Day1	Treated	12	1	2	55614995	34.85	52232070	39290183	2530506	50801	142777	0.173935
84_CCGTCC_L003	6	Day1	Treated	13	1	3	51280133	34.81	48350438	38255539	4633854	46812	132182	0.264207
92_GTCCGC_L003	7	Day1	Treated	13	1	3	54910092	34.81	51993321	43325943	3689555	48990	151205	0.26723
93_GTGAAA_L003	8	Day1	Treated	13	1	3	58033031	35.14	55580928	40559750	3752319	50061	167222	0.140603
102_GTGGCC_L004	9	Day1	Treated	14	1	4	55591833	35.4	53370571	44638067	2553827	57000	189240	0.244353
103_ATTCCT_L004	10	Day1	Treated	14	1	4	52596429	35.71	51252192	43377011	2553209	82404	204680	0.298282
130_ATCACG_L005	11	Day1	Treated	15	1	5	55555652	35.28	53615411	41097185	3494778	49241	170929	0.203847
155_CGATGT_L005	12	Day1	Treated	15	1	5	76629319	35.15	73138923	58400529	1944852	87760	240849	0.316061
156_ACAGTG_L005	13	Day1	Treated	15	1	5	28066461	35.09	26719570	21964644	1839227	33978	77557	0.262114
158_GCCAAT_L006	14	Day1	Treated	16	1	6	53539553	34.99	50648293	45309724	2191052	67606	162244	0.315986
164_TTAGGC_L006	15	Day1	Treated	16	1	6	41062771	35.29	39545103	31925154	3159015	41475	118447	0.405754
208_CAGATC_L007	16	Day1	Untreated	17	1	7	26209455	35.07	24443697	20612673	3335455	23837	87475	0.181675
216_ACTTGA_L007	17	Day1	Untreated	17	1	7	70016669	35.47	67415572	56255245	3498544	62753	202620	0.260194
220_TGACCA_L007	18	Day1	Untreated	17	1	7	21907828	35.16	20695675	17656228	4102371	18503	71667	0.215647
227_ATGTCA_L008	19	Day1	Untreated	18	1	8	55312466	35.36	52703369	45163638	2771254	59496	149263	0.318279
228_CCGTCC_L008	20	Day1	Untreated	18	1	8	34080311	35.35	32659118	28514109	2624568	22987	114661	0.176401
261_GTCCGC_L001	21	Day1	Untreated	21	2	1	34338217	35.18	32563714	26198981	4182001	31746	97616	0.203105
281_GTGAAA_L001	22	Day1	Untreated	21	2	1	36176709	35.24	34445214	29577392	2551960	34223	129942	0.204747
285_GTGGCC_L001	23	Day1	Untreated	21	2	1	63607565	35.49	61119500	46706718	1421774	62546	181727	0.168801
286_GTTTCG_L002	24	Day1	Untreated	22	2	2	40564315	35.01	38467390	34000756	2913129	41803	140370	0.228316
287_CGTACG_L002	25	Day1	Untreated	22	2	2	46786199	34.98	44139338	36280650	1463575	54129	187136	0.224845
289_GAGTGG_L003	26	Day1	Untreated	23	2	3	51425202	34.54	47202248	38356312	2577947	38401	150877	0.194843
298_ACTGAT_L003	27	Day1	Untreated	23	2	3	54748373	34.97	51867613	44958518	2831475	43935	180794	0.173336
349_TGACCA_L003	28	Day1	Untreated	23	2	3	30047796	34.71	28034966	24351778	1219836	22863	100632	0.375976
372_CAGATC_L004	29	Day1	Untreated	24	2	4	23736703	35.49	22683717	16895206	2726636	47656	72598	0.138262
376_ACTTGA_L004	30	Day1	Untreated	24	2	4	58771628	35.48	56205618	42557433	2714509	61094	166198	0.176688
11p2_GATCAG_L001	1	Day 11	Treated	11	1	1	29669806	35.07	28389347	23895589	3237473	45733	93148	0.448676
37p2_TAGCTT_L001	2	Day 11	Treated	11	1	1	52614262	35.08	50404105	41138842	3085320	91402	147556	0.50574
51p2_GGCTAC_L002	3	Day 11	Treated	12	1	2	46571417	34.8	44048799	38220147	1647468	86536	146838	0.52409
62p2_CTTGTA_L002	4	Day 11	Treated	12	1	2	47141374	35.01	44778876	37172830	3119388	89275	129542	0.452631
83p2_AGTCAA_L002	5	Day 11	Treated	12	1	2	65548349	35.05	62394918	39853404	2370012	89779	155511	0.304666
84p2_AGTTCC_L003	6	Day 11	Treated	13	1	3	34443438	35.02	32743305	26206629	3744889	60157	82284	0.623454
92p2_ATCACG_L003	7	Day 11	Treated	13	1	3	66782066	35.15	64222092	51185393	1158742	90755	189446	0.265692
93p2_TTAGGC_L004	8	Day 11	Treated	14	1	4	48348096	35.69	47031397	37799483	2716343	84776	142964	0.408337
102p2_TGACCA_L004	9	Day 11	Treated	14	1	4	30670200	35.52	29448145	23908771	2369338	29527	145182	0.145716
103p2_ACTGAT_L004	10	Day 11	Treated	14	1	4	38074219	35.71	37083085	31243539	2219401	66204	135419	0.328133
130p2_ATTCCT_L005	11	Day 11	Treated	15	1	5	61997511	35.47	60214244	48740862	4057605	110769	202677	0.287936
155p2_GTGGCC_L005	12	Day 11	Treated	15	1	5	29739401	35.48	28764726	18320679	2928288	29813	122019	0.108568
156p2_GTTTCG_L006	13	Day 11	Treated	16	1	6	49975590	35.52	48532827	35376729	2290594	71124	148121	0.351758
158p2_CGTACG_L006	14	Day 11	Treated	16	1	6	80355147	35.08	76323857	68065491	3965980	132632	253920	0.39781
164p2_GAGTGG_L006	15	Day 11	Treated	16	1	6	26823553	35	25322716	22311700	3096126	44098	75346	0.191043
208p2_TAGCTT_L007	16	Day 11	Untreated	17	1	7	61286424	35.73	59749182	48543446	3268122	94694	197609	0.376738
216p2_GGCTAC_L007	17	Day 11	Untreated	17	1	7	42686592	35.46	41214734	36314805	1421234	75602	144781	0.488326
220p2_CTTGTA_L008	18	Day 11	Untreated	18	1	8	13489760	35.34	12754079	9468742	5836885	18177	39895	0.178976
227p2_AGTCAA_L008	19	Day 11	Untreated	18	1	8	54923602	35.82	53563269	41505387	3322451	95820	193837	0.280982
228p2_AGTTCC_L008	20	Day 11	Untreated	18	1	8	55020213	35.76	53474750	40519986	3235590	74715	193650	0.288176
261p2_ATGTCA_L001	21	Day 11	Untreated	21	2	1	54771620	35.53	52546916	39561059	3360476	76234	210461	0.189103
281p2_CCGTCC_L001	22	Day 11	Untreated	21	2	1	47987247	35.41	46045972	37891591	2347754	78948	150073	0.316973
285p2_GTGAAA_L002	23	Day 11	Untreated	22	2	2	71610406	35.3	68824576	54010235	5102863	131930	201347	0.328396
286p2_GTCCGC_L002	24	Day 11	Untreated	22	2	2	45363197	35.2	43373764	32567904	2872877	70066	145712	0.232713
287p2_ATCACG_L002	25	Day 11	Untreated	22	2	2	56833758	35.2	54532170	40870571	1727786	96097	132257	0.478523
289p2_CGATGT_L003	26	Day 11	Untreated	23	2	3	70450534	35.05	66767595	43834559	1646611	91137	165963	0.426337
298p2_TTAGGC_L003	27	Day 11	Untreated	23	2	3	50745968	35.19	48555641	35772337	3786022	73304	156095	0.33621
349p2_CGATGT_L004	28	Day 11	Untreated	24	2	4	58939701	35.52	56391886	44845183	3440191	101223	171525	0.207308
372p2_ACAGTG_L004	29	Day 11	Untreated	24	2	4	35654430	35.3	33845122	30347544	1676403	18477	120938	0.483878
376p2_GCCAAT_L004	30	Day 11	Untreated	24	2	4	40178825	35.4	38453735	33873573	3109820	49849	121290	0.476164
